# Supplementary material
Source: Springer Nature journal article supplement (https://www.springermedizin.de/resource/supplementary/12913_2011_2015_MOESM1_ESM.pdf/9530678)

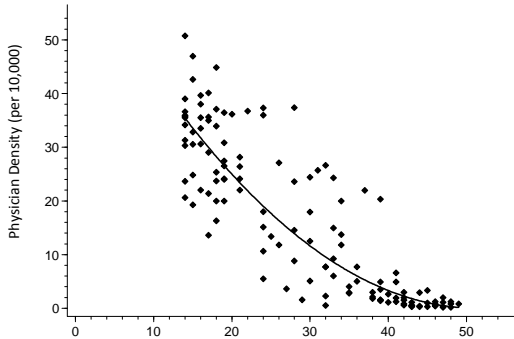

Proportion of Population under age 15 years

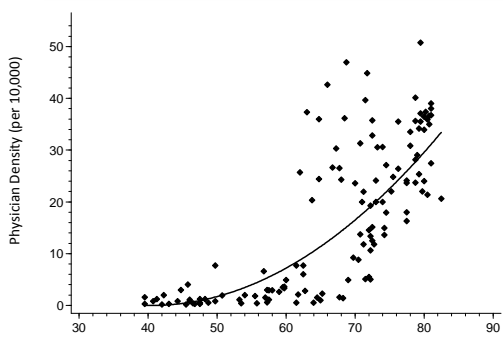

Life Expectancy (years)

Supplement: MOESM1 [file 9530678]
